# Supplementary material
Source: Springer Nature journal article supplement (https://www.springermedizin.de/resource/supplementary/12974_2011_438_MOESM14_ESM.pdf/9601288)

(A) Saphenous nerve

Distal

Middle

Proximal

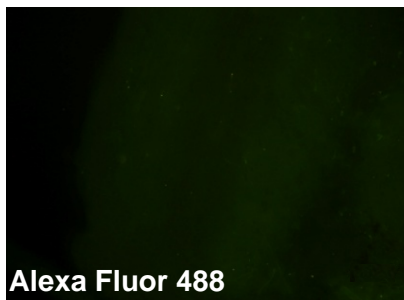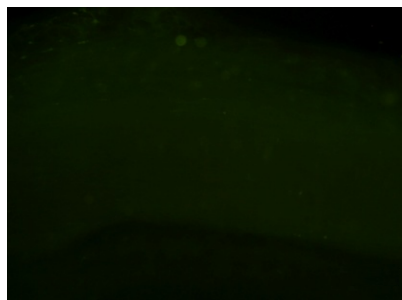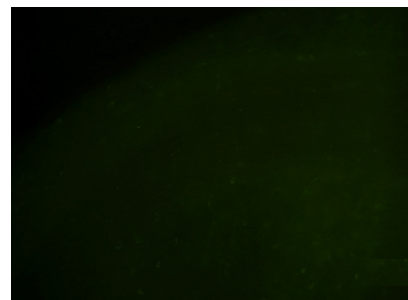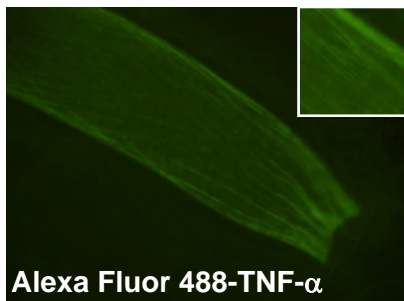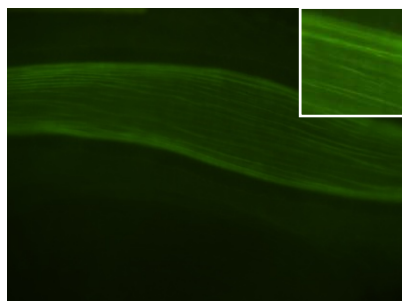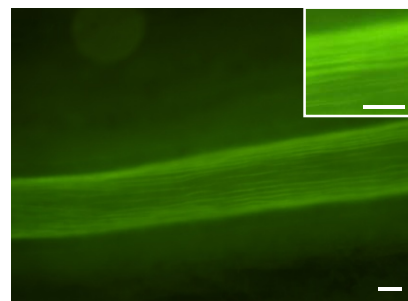

(B) *In vivo*

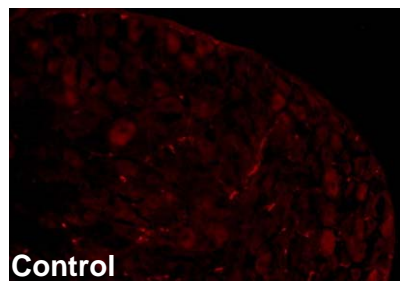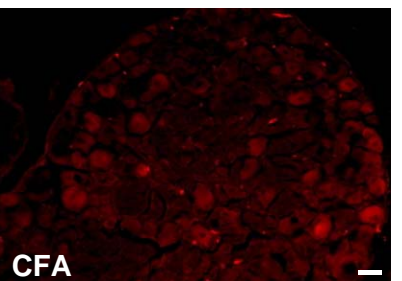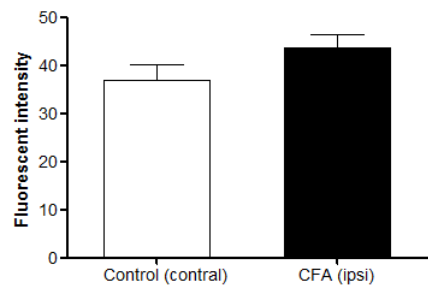

(C) *In vitro*

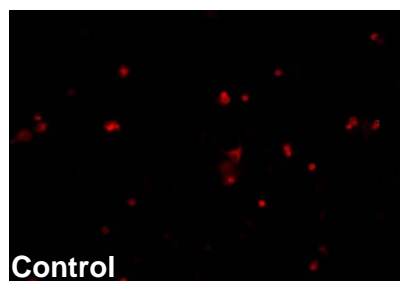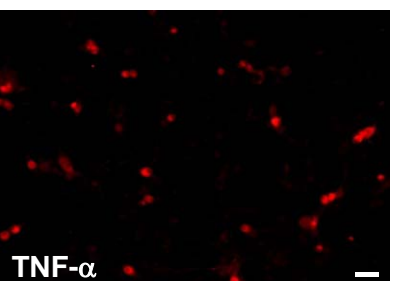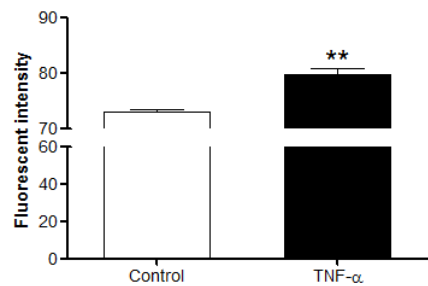

Supplement: MOESM14 [file 9601288]
